# Supplementary material for: The impact of the 2014 Ebola virus disease outbreak in Liberia on parent preferences for harsh discipline practices: a quasi-experimental, pre-post design
Source: PubMed Central journal article supplement (PMC5797936; doi:10.1017/gmh.2017.24), 2018-01-09
Supplement: S2054425117000243sup001.pdf [file S2054425117000243sup001.pdf]

# Appendix A. Appendix

Table A.1: Associations between EVD exposure and parent-reported Strengths & Difficulties Questionnaire for children, individual items & sub-scales

|                                                                              | EVD in Household | No EVD in Household |        |
|------------------------------------------------------------------------------|------------------|---------------------|--------|
|                                                                              | Adj. Mean        | Adj. Mean           | t-stat |
| <b>Total Difficulties Score</b>                                              | 0.77             | 0.92                | 2.22   |
| <b>Conduct Problems Sub-scale</b>                                            | 0.61             | 0.81                | 1.82   |
| <i>Often loses temper</i>                                                    | 0.61             | 1.02                | 2.08   |
| <i>Generally well behaved, usually does what adults request</i>              | 1.13             | 1.43                | 1.71   |
| <i>Often fights with other children or bullies them</i>                      | 0.66             | 1.10                | 2.24   |
| <i>Often argumentative with adults</i>                                       | 0.46             | 0.55                | 0.51   |
| <i>Can be spiteful to others</i>                                             | 0.47             | 0.82                | 1.84   |
| <b>Emotional Symptoms Sub-scale</b>                                          | 0.86             | 0.94                | 0.74   |
| <i>Often complains of headaches, stomach-aches or sickness</i>               | 0.83             | 0.94                | 0.53   |
| <i>Many worries or often seems worried</i>                                   | 0.64             | 0.91                | 1.52   |
| <i>Often unhappy, depressed or tearful</i>                                   | 1.13             | 0.95                | 0.96   |
| <i>Nervous or clingy in new situations, easily loses confidence</i>          | 0.47             | 0.87                | 1.89   |
| <i>Many fears, easily scared</i>                                             | 1.18             | 1.00                | 0.96   |
| <b>Hyperactivity/Inattention Sub-scale</b>                                   | 1.09             | 1.10                | 0.12   |
| <i>Restless, overactive, cannot stay still for long</i>                      | 1.07             | 1.23                | 0.71   |
| <i>Constantly fidgeting or squirming</i>                                     | 1.24             | 1.28                | 0.21   |
| <i>Easily distracted, concentration wanders</i>                              | 1.02             | 1.00                | 0.11   |
| <i>Can stop and think things out before acting</i>                           | 1.00             | 0.91                | 0.40   |
| <i>Good attention span, sees work through to the end</i>                     | 0.77             | 1.10                | 1.54   |
| <b>Peer/Relationship Problems Sub-scale</b>                                  | 0.55             | 0.85                | 3.46   |
| <i>Rather solitary, prefers to play alone</i>                                | 0.64             | 0.81                | 0.79   |
| <i>Has at least one good friend</i>                                          | 1.42             | 1.29                | 0.58   |
| <i>Generally liked by other children</i>                                     | 1.85             | 1.41                | 2.81   |
| <i>Picked on or bullied by other children</i>                                | 0.78             | 1.18                | 2.07   |
| <i>Gets along better with adults than with other children</i>                | 0.59             | 0.98                | 1.75   |
| <b>Prosocial Sub-scale</b>                                                   | 1.17             | 1.15                | 0.21   |
| <i>Considerate of other people's feelings</i>                                | 1.02             | 1.09                | 0.31   |
| <i>Shares readily with other children, for example toys, treats, pencils</i> | 1.28             | 1.32                | 0.22   |
| <i>Helpful if someone is hurt, upset or feeling ill</i>                      | 0.79             | 0.82                | 0.17   |
| <i>Kind to younger children</i>                                              | 1.54             | 1.37                | 1.09   |
| <i>Often offers to help others (parents, teachers, other children)</i>       | 1.13             | 1.03                | 0.50   |

Note. Answers to each item range between 0 and 2. Sub-scales are created by averaging responses for items in each category. Total Difficulties Score is used in the main analysis and excludes the prosocial sub-scale. Means are adjusted for child's gender and age at baseline.
